# Supplementary material for: Enhanced stability of α-phase FAPbI3perovskite solar cells by insertion of 2D (PEA)2PbI4nanosheets
Source: Royal Society of Chemistry journal article supplement (doi:10.1039/c9ta14207j), 2020-01-01
Supplement: c9ta14207j1.pdf [file c9ta14207j1.pdf]

# Enhanced stability of $\alpha$ -phase FAPbI<sub>3</sub> perovskite solar cells by insertion of 2D (PEA)<sub>2</sub>PbI<sub>4</sub> nanosheets

Ruiyuan Hu <sup>a,b</sup> Yi Zhang <sup>b\*</sup> Sanghyun Paek <sup>b</sup>, Xiao-Xin Gao <sup>b</sup>, Xing'ao Li <sup>a,c\*</sup> and Mohammad  
Khaja Nazeeruddin <sup>b\*</sup>

<sup>a</sup> Key Laboratory for Organic Electronics and Information Displays & Institute of Advanced  
Materials (IAM), Jiangsu National Synergetic Innovation Center for Advanced Materials  
(SICAM), School of Materials Science and Engineering, Nanjing University of Posts and  
Telecommunications, 9 Wenyuan Road, Nanjing 210023, PR China. E-mail: Xing'ao Li.  
[iamxali@njupt.edu.cn](mailto:iamxali@njupt.edu.cn)

<sup>b</sup> Group for Molecular Engineering of Functional Materials, EPFL Valais Wallis, CH-1951 Sion,  
Switzerland. E-mail: [yi.zhang@epfl.ch](mailto:yi.zhang@epfl.ch); [mdkhaja.nazeeruddin@epfl.ch](mailto:mdkhaja.nazeeruddin@epfl.ch)

<sup>c</sup> New Energy Technology Engineering Laboratory of Jiangsu Province, School of Science,  
Nanjing University of Posts and Telecommunications, Nanjing 210023, PR China.

## 1. Experimental details and additional data.

General: All materials were purchased from Sigma-Aldrich, TCI and Acros and used as received, unless stated otherwise.

(PEA)<sub>2</sub>PbI<sub>4</sub> NSs prepared: 0.8 mmol of PEA<sub>2</sub>I and 0.4 mmol of PbI<sub>2</sub> were dissolved in a mixture of 10 mL of DMF and 12.5  $\mu$ L of *n*-octylamine to form a perovskite precursor solution. Then, 15  $\mu$ L of the perovskite precursor solution was quickly dropped into 10 mL of methylene dichloride under vigorous stirring. The solution was centrifuged at 3,500 rpm for 3 min to remove the aggregated precipitates. Finally, the (PEA)<sub>2</sub>PbI<sub>4</sub> NSs were obtained after centrifugation at 15,000 rpm for 5 min.

The prepared (PEA)<sub>2</sub>PbI<sub>4</sub> NSs were dispersed in chlorobenzene (CB) for further use. To probe the effects of various concentrations of (PEA)<sub>2</sub>PbI<sub>4</sub> NSs, they were dispersed in CB and were fixed the concentration at 6 mg mL<sup>-1</sup>, 12 mg mL<sup>-1</sup> and 18mg mL<sup>-1</sup>.

Device Fabrication: FTO glass (Nippon sheet glass) substrates were sequentially cleaned with the detergent solution, acetone, and ethanol in an ultraphonic bath. A compact TiO<sub>2</sub> layer was then coated on the clean FTO substrate by spray pyrolysis deposition at 450 °C with a precursor solution prepared by diluting 900  $\mu$ L titanium diisopropoxide in 15 ml ethanol. Mesoporous TiO<sub>2</sub> films were prepared using a diluted TiO<sub>2</sub> paste (Greatcell Solar 30 NR-D) in ethanol solution with weight ratio of 1:10. Films were spin-coated at 5000 rpm for 20 s, and sintered on a hot plate at 500 °C for 30 min. After cooling down to room temperature, a thin SnO<sub>2</sub> layer was deposited on the surface of mesoporous TiO<sub>2</sub> layer by spin-coating 1 mM SnCl<sub>4</sub> aqueous solution at 3000 rpm for 20 s, and finally baked at 190 °C for 1 h. The 1.2 M Cs<sub>0.1</sub>FA<sub>0.9</sub>PbI<sub>3</sub> precursor solution was prepared by mixing CsI (31.2 mg), PbI<sub>2</sub> (553.38 mg) and FAI (185.78 mg) in mixed solvent of 800  $\mu$ l DMF

and 200  $\mu\text{l}$  DMSO. Then,  $\text{Cs}_{0.1}\text{FA}_{0.9}\text{PbI}_3$  precursor solution was spin-coated at 1000 rpm for 10 s and continuously at 4000 rpm for 30 s. During the second step, 100  $\mu\text{l}$  of CB with/without  $(\text{PEA})_2\text{PbI}_4$  NSs was poured 15 seconds before the process was finished. The substrates were annealed at 150  $^\circ\text{C}$  for 10 min. Finally, Spiro-OMeTAD was spin-coated at 4000 rpm for 20 s. The Spiro-OMeTAD solution was prepared by dissolving in chlorobenzene at 70 mM and adding 4-tert-butylpyridine, Li-TFSI in acetonitrile, and  $\text{Co}[\text{t-BuPyPz}]_3[\text{TFSI}]_3$  (FK209) in acetonitrile at the molar ratio of Spiro-OMeTAD: FK209 : LiTFSI : TBP of 1 :0.03: 0.5: 3.3. Devices were fabricated with a 70 nm thick gold counter electrode by using thermal evaporation.

For SCLC measurement. Electron-only device is fabricated as follows: FTO/c-TiO<sub>2</sub>/m-TiO<sub>2</sub>/perovskite layers are deposited in the same way of PSCs. After cooling down perovskite layer, PCBM solution (20 mg·ml<sup>-1</sup> in CB) was spin-coated on perovskite at 1500 rpm for 30 s, and then heated at 70  $^\circ\text{C}$  for 10 min. And finally, 70 nm thick gold counter electrode by using thermal evaporation. hole-only device is fabricated as follows: PEDOT:PSS was spin-coated on clean FTO at 2500 rpm for 40 s, and then heated at 120  $^\circ\text{C}$  for 10 min. Perovskite and spiro-OMeTAD layers were deposited the same as PSCs. At last, 70 nm thick gold counter electrode by thermal evaporation.

Film and device characterization. X-ray diffraction (XRD) analysis was carried out using a Bruker D8 Advance diffractometer in an angle range of  $2\theta = 5^\circ$  to  $45^\circ$ . The glancing-angle incidence XRD measurements were carried out with glancing angle ranging from  $0.3^\circ$  to  $4^\circ$ . The morphology of the films was characterized using a high resolution scanning electron microscope (SEM, ZEISS Merlin). It was carried out two days after preparing the films. The absorbance and reflectance were measured with an integrating sphere using UV/Vis/NIR spectroscopy (PerkinElmer Lambda). The steady-state PL and time-resolved PL spectra were record by a lab-built spectrophotometer under

395 nm excitation. The PL life time was obtained by fitting the time-resolved PL spectra via biexponential decay functions. The solar cell measurement was done using commercial solar simulators (Oriel, 450 W Xenon, AAA class/Oriel VeraSol-2, LED, AAA class). The light intensity was calibrated with a Si reference cell equipped with an IR-cutoff filter (KG5, Newport), and it was recorded before each measurement. Current–voltage characteristics of the cells were obtained by applying an external voltage bias while measuring the current response using a digital source meter (Keithley 2400/2604). The voltage scan rate was 10 or 25 mV s<sup>-1</sup> and no device preconditioning such as light soaking, or forward voltage bias applied for a long time, was applied before starting the measurement. The cells were masked with an active area of 0.16 cm<sup>2</sup> to fix the active area and reduce the influence of the scattered light. EQE was measured by IQE200B (Oriel) under the monochromatic light intensity calibrated by a reference silicon detector.

## 2. Additional Data

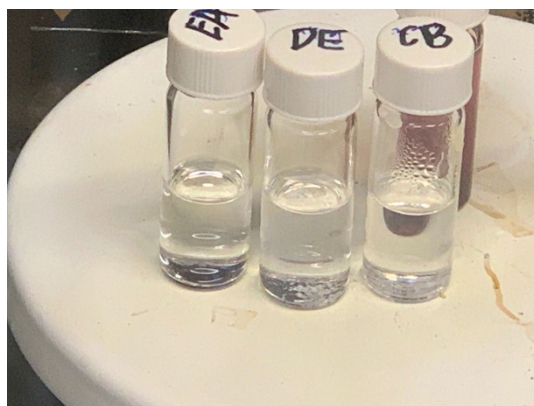

**Figure S1.** 1 mg PEAI was dissolved in ethyl acetate (EA), diethyl ether (DE), and chlorobenzene (CB) respectively under heated at 60 °C for 6 hours.

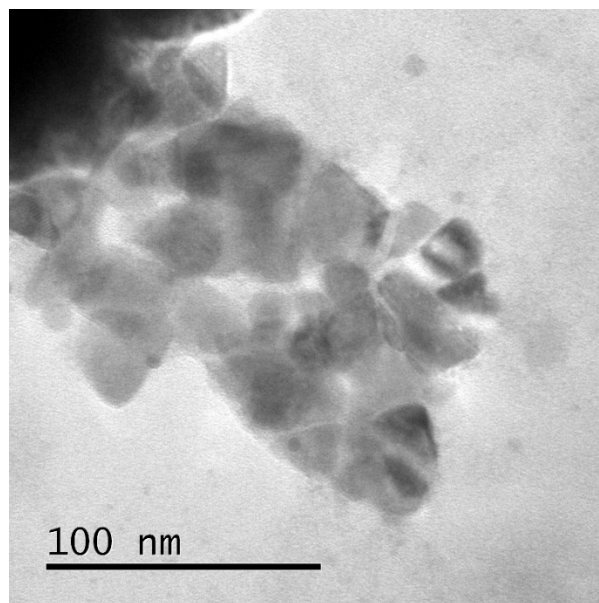

**Figure S2.** TEM image of 2D (PEA)<sub>2</sub>PbI<sub>4</sub> nanosheets

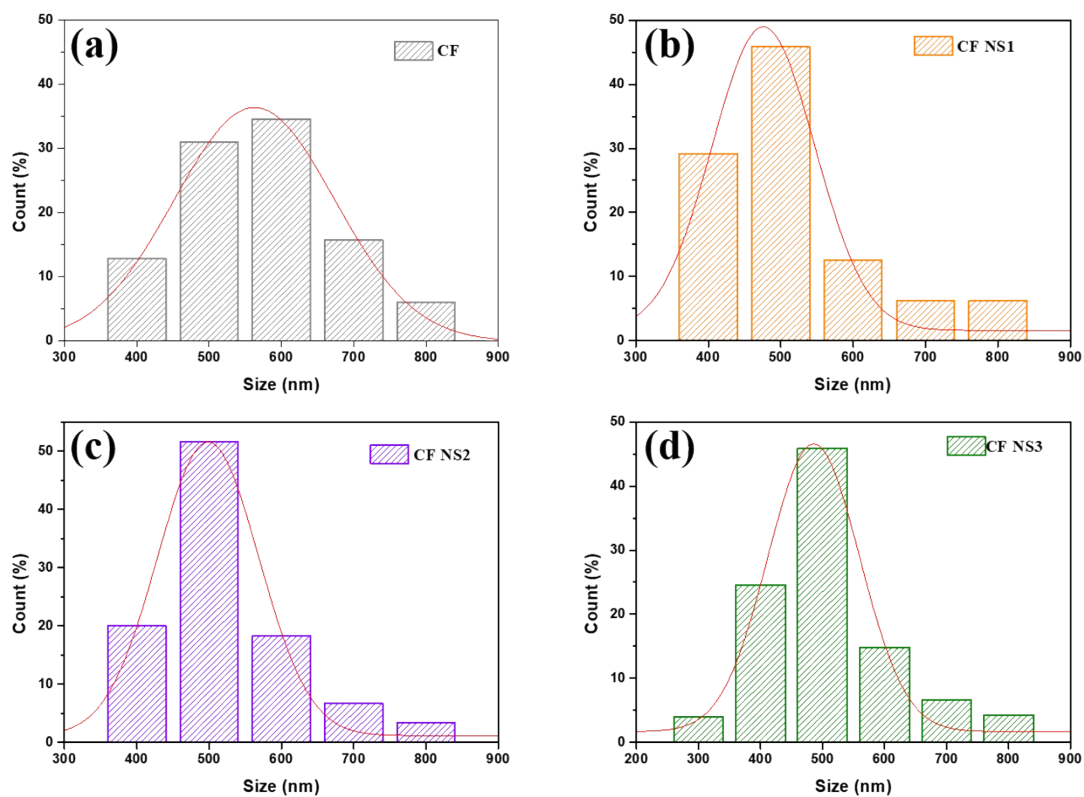

**Figure S3.** The grain size statistics of  $\text{Cs}_{0.1}\text{FA}_{0.9}\text{PbI}_3$  perovskite thin films: (a) CF, (b) CF NS1, (c) CF NS2 and (d) CF NS3.

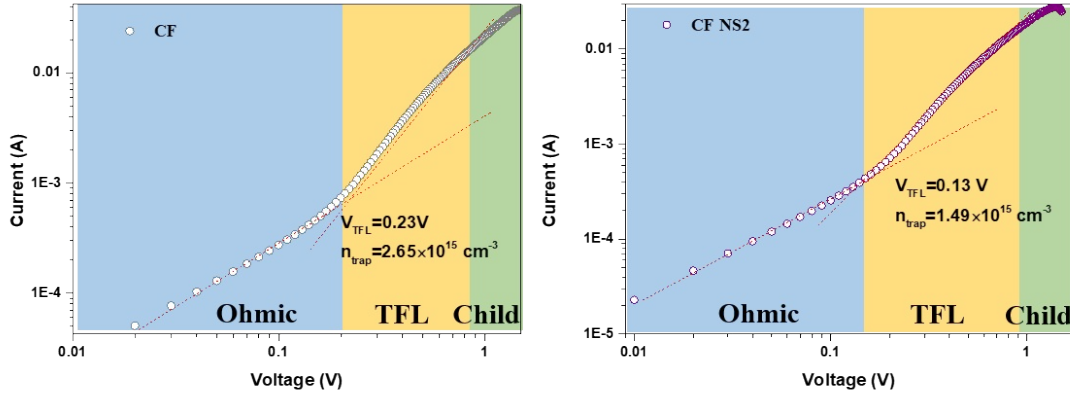

**Figure S4.** The space charge-limited current versus voltage of electron-only device based-on (a) CF and (b) CF NS2.

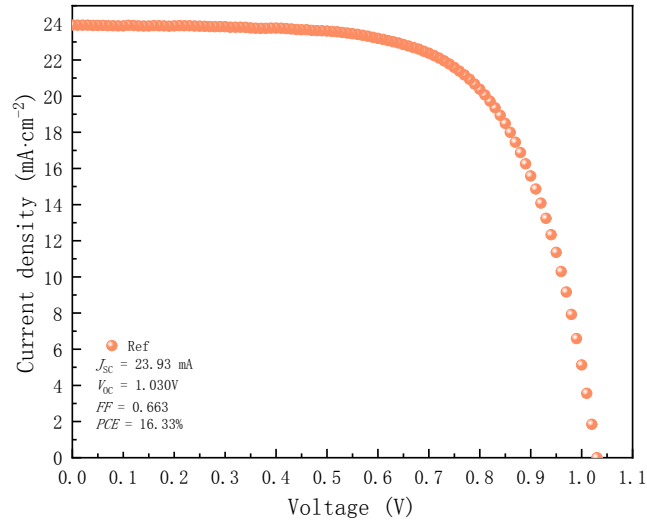

**Figure S5.** J-V curves of the device based-on CF with 1% PEAI doping under reverse scan direction.

**Table S1.** Fitting parameters for the time-resolved PL spectra of CF and CF NS2 perovskite thin films. The fitting equation is  $y = A_1 \cdot \exp(-x/\tau_1) + A_2 \cdot \exp(-x/\tau_2)$ .

| Sample | R <sup>2</sup> | $\tau_{\text{avg}}$ (ns) |
|--------|----------------|--------------------------|
| CF     | 0.996          | 66.14                    |
| CF NS2 | 0.982          | 186.08                   |

**Table S2.** Fitting parameters for the time-resolved PL spectra of CF and CF NS2 perovskite thin films with ETL (TiO<sub>2</sub>) and HTL (spiro-OMeTAD). The fitting equation is  $y = A_1 \cdot \exp(-x/\tau_1) + A_2 \cdot \exp(-x/\tau_2)$ .

| Sample                  | R <sup>2</sup> | $\tau_{\text{avg}}$ (ns) |
|-------------------------|----------------|--------------------------|
| CF/TiO <sub>2</sub>     | 0.975          | 161.70                   |
| CF NS2/TiO <sub>2</sub> | 0.998          | 20.69                    |
| CF/spiro-OMeTAD         | 0.998          | 30.96                    |
| CFNS2/spiro-OMeTAD      | 0.997          | 20.38                    |

**Table S3.** The photovoltaic performance summary of devices based on CF NS2

| Sample | Scan direction | $J_{\text{sc}}$ (mA/cm <sup>2</sup> ) | Ave $J_{\text{sc}}$ (mA/cm <sup>2</sup> ) | $V_{\text{oc}}$ (V) | Ave $V_{\text{oc}}$ (V) | $FF$  | Ave $FF$ | $PCE$ (%) | Ave $PCE$ (%) |
|--------|----------------|---------------------------------------|-------------------------------------------|---------------------|-------------------------|-------|----------|-----------|---------------|
| NS2    | RS             | 24.67                                 | 24.68                                     | 1.054               | 1.045                   | 0.779 | 0.776    | 20.27     | 20.01         |
|        | FR             | 24.68                                 |                                           | 1.036               |                         | 0.773 |          | 19.75     |               |

**Table S4.** The photovoltaic performance summary of devices based on CF and CF NS2, which were collected from the J-V curve under reverse scan direction.

| CF | $J_{sc}$<br>(mA/cm <sup>2</sup> ) | $V_{oc}$ (V) | $FF$  | $PCE$<br>(%) | CF<br>NS<br>2 | $J_{sc}$<br>(mA/cm <sup>2</sup> ) | $V_{oc}$<br>(V) | $FF$  | $PCE$<br>(%) |
|----|-----------------------------------|--------------|-------|--------------|---------------|-----------------------------------|-----------------|-------|--------------|
|    | 24.64                             | 0.9659       | 0.75  | 17.86        |               | 24.83                             | 1.059           | 0.778 | 20.44        |
|    | 24.64                             | 0.9515       | 0.746 | 17.49        |               | 24.44                             | 1.063           | 0.753 | 19.58        |
|    | 24.99                             | 0.9632       | 0.75  | 18.07        |               | 24.85                             | 1.037           | 0.754 | 19.44        |
|    | 25.08                             | 0.964        | 0.738 | 17.84        |               | 24.46                             | 1.055           | 0.758 | 19.57        |
|    | 24.51                             | 0.9731       | 0.754 | 17.99        |               | 24.88                             | 1.063           | 0.743 | 19.65        |
|    | 24.66                             | 0.9626       | 0.732 | 17.38        |               | 24.7                              | 1.089           | 0.761 | 20.45        |
|    | 24.46                             | 0.9683       | 0.744 | 17.61        |               | 24.64                             | 1.07            | 0.74  | 19.52        |
|    | 24.78                             | 0.9607       | 0.731 | 17.4         |               | 24.37                             | 1.085           | 0.761 | 20.12        |
|    | 24.81                             | 0.9608       | 0.738 | 17.58        |               | 24.76                             | 1.076           | 0.762 | 20.3         |
|    | 24.52                             | 0.9658       | 0.741 | 17.54        |               | 24.69                             | 1.085           | 0.751 | 20.1         |
|    | 24.65                             | 0.9686       | 0.746 | 17.82        |               | 24.96                             | 1.058           | 0.738 | 19.49        |
|    | 24.73                             | 0.9628       | 0.746 | 17.77        |               | 24.85                             | 1.041           | 0.75  | 19.4         |
|    | 24.74                             | 0.9814       | 0.759 | 18.44        |               | 24.85                             | 1.037           | 0.754 | 19.44        |
|    | 24.99                             | 0.9632       | 0.742 | 17.85        |               | 24.88                             | 1.063           | 0.743 | 19.65        |
|    | 24.95                             | 0.9949       | 0.722 | 17.91        |               | 25.04                             | 1.044           | 0.74  | 19.34        |
|    | 24.94                             | 1.015        | 0.713 | 18.03        |               | 24.9                              | 1.044           | 0.745 | 19.37        |
|    | 24.62                             | 1.007        | 0.729 | 18.08        |               | 24.51                             | 1.04            | 0.757 | 19.3         |
|    | 24.66                             | 1.014        | 0.724 | 18.11        |               | 24.65                             | 1.049           | 0.745 | 19.26        |
|    | 24.86                             | 0.9773       | 0.747 | 18.15        |               | 25.05                             | 1.075           | 0.744 | 20.03        |
|    | 25.05                             | 0.9746       | 0.744 | 18.17        |               | 25.04                             | 1.067           | 0.758 | 20.25        |
|    | 24.85                             | 1.008        | 0.728 | 18.23        |               | 25.07                             | 1.068           | 0.757 | 20.27        |



|     |       |        |       |       |  |       |       |       |       |
|-----|-------|--------|-------|-------|--|-------|-------|-------|-------|
|     | 25.14 | 0.9609 | 0.755 | 18.24 |  | 24.93 | 1.076 | 0.758 | 20.33 |
|     | 24.99 | 1.004  | 0.727 | 18.24 |  | 25.09 | 1.064 | 0.747 | 19.94 |
|     | 24.99 | 1.023  | 0.716 | 18.31 |  | 24.44 | 1.043 | 0.76  | 19.36 |
|     | 24.66 | 1.032  | 0.72  | 18.33 |  | 24.85 | 1.045 | 0.773 | 20.06 |
| Avg | 24.79 | 0.957  | 0.752 | 17.83 |  | 24.96 | 1.023 | 0.762 | 19.46 |
